# Supplementary material for: Effect of High-Dose vs Standard-Dose Vitamin D3 Supplementation on Body Composition among Patients with Advanced or Metastatic Colorectal Cancer: A Randomized Trial
Source: PubMed Central journal article supplement (PMC7699725; doi:10.3390/cancers12113451), 2020-11-20
Supplement: cancers-12-03451-s001.pdf [file cancers-12-03451-s001.pdf]

# Supplementary Materials: Effect of High-Dose VS Standard-Dose Vitamin D<sub>3</sub> Supplementation on Body Composition Among Patients with Advanced or Metastatic Colorectal Cancer: A Randomized Trial

Justin C. Brown, Michael H. Rosenthal, Chao Ma, Sui Zhang, Halla S. Nimeiri, Nadine J. McCleary, Thomas A. Abrams, Matthew B. Yurgelun, James M. Cleary, Douglas A. Rubinson, Deborah Schrag, Andrea J. Bullock, Jill Allen, Dan Zuckerman, Emily Chan, Jennifer A. Chan, Brian Wolpin, Michael Constantine, Douglas J. Weckstein, Meredith A. Faggen, Christian A. Thomas, Chryssanthi Kournioti, Chen Yuan, Hui Zheng, Bruce W. Hollis, Charles S. Fuchs, Kimmie Ng and Jeffrey A. Meyerhardt

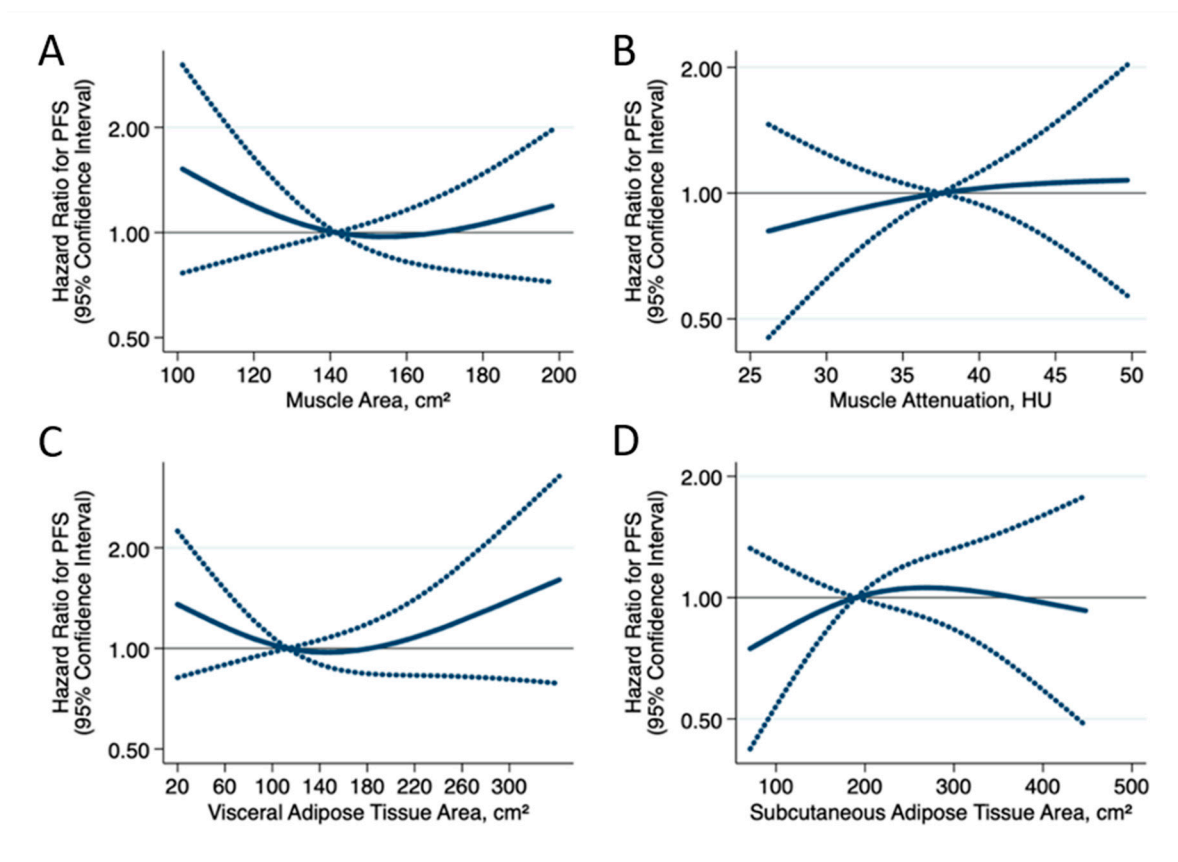

**Figure S1.** Association of baseline body composition with progression-free survival (PFS), by (A) muscle area; (B) muscle attenuation; (C) visceral adipose tissue area; and (D) subcutaneous adipose tissue area. Solid line represents the point estimate of the hazard ratio and dotted lines represent the corresponding 95% confidence intervals. Estimates are multivariable adjusted for age, number of metastatic sites, sex, race, and ECOG performance status. Note differential  $x$ - and  $y$ -axis scaling between graphs.

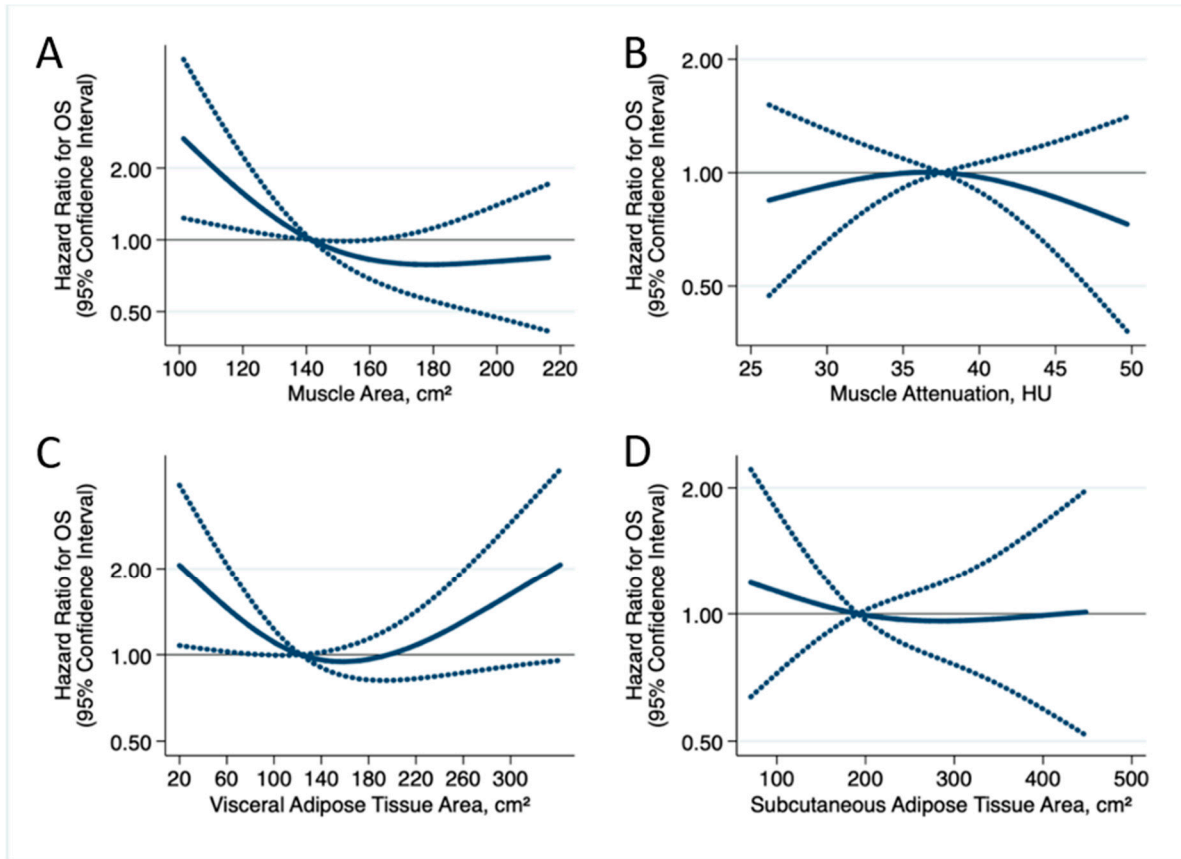

**Figure S2.** Association of baseline body composition with overall survival (OS), by (A) muscle area; (B) muscle attenuation; (C) visceral adipose tissue area; and (D) subcutaneous adipose tissue area. Solid line represents the point estimate of the hazard ratio and dotted lines represent the corresponding 95% confidence intervals. Estimates are multivariable adjusted for age, number of metastatic sites, sex, race, and ECOG performance status. Note differential  $x$ - and  $y$ -axis scaling between graphs.

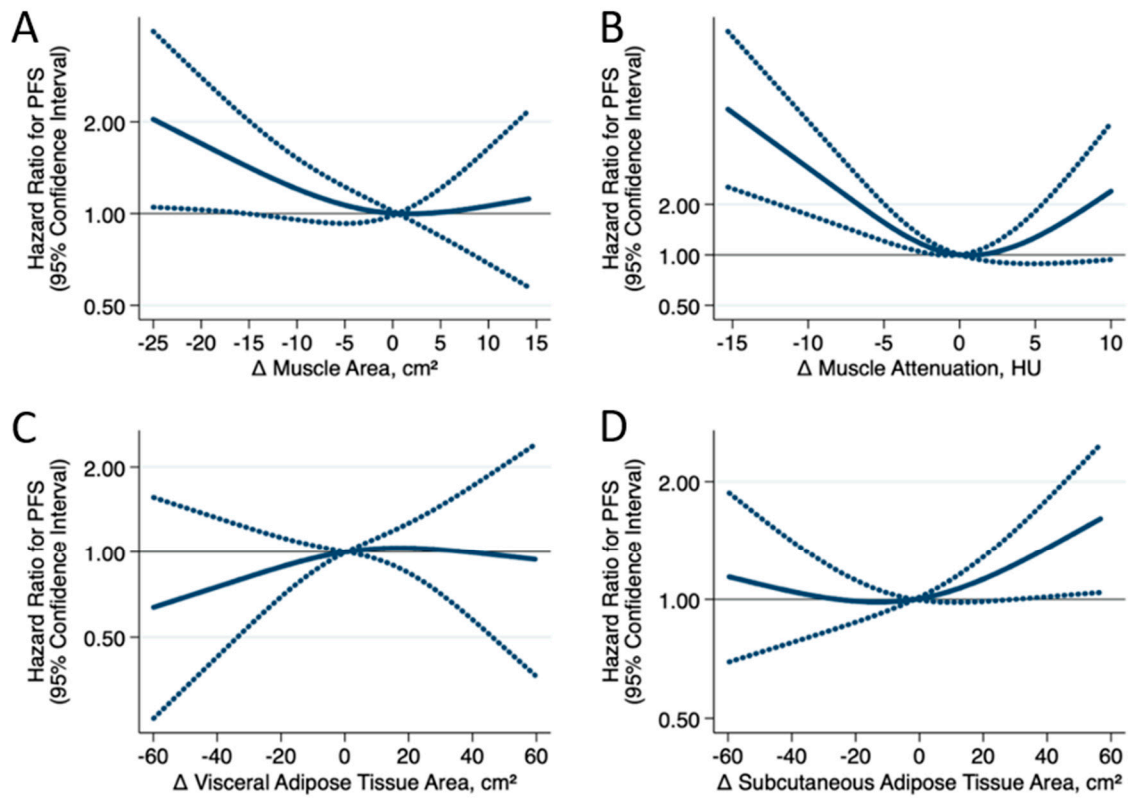

**Figure S3.** Association of change in body composition from baseline to follow-up with progression-free survival (PFS), by (A) muscle area; (B) muscle attenuation; (C) visceral adipose tissue area; and (D) subcutaneous adipose tissue area. Solid line represents the point estimate of the hazard ratio and dotted lines represent the corresponding 95% confidence intervals. Estimates are multivariable adjusted for age, number of metastatic sites, sex, race, and ECOG performance status. Note differential  $x$ - and  $y$ -axis scaling between graphs.

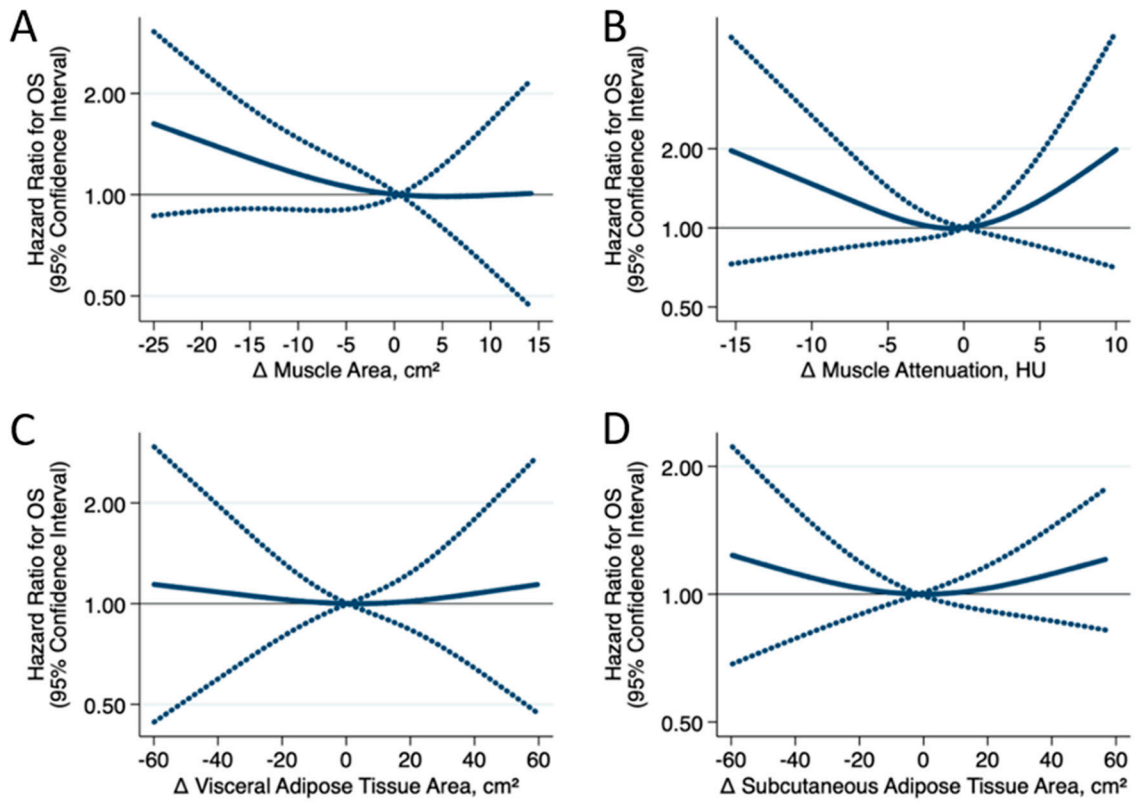

**Figure S4.** Association of change in body composition from baseline to follow-up with overall survival (OS), by (A) muscle area; (B) muscle attenuation; (C) visceral adipose tissue area; and (D) subcutaneous adipose tissue area. Solid line represents the point estimate of the hazard ratio and dotted lines represent the corresponding 95% confidence intervals. Estimates are multivariable adjusted for age, number of metastatic sites, sex, race, and ECOG performance status. Note differential x- and y-axis scaling between graphs.

**Table S1.** Comparison of baseline characteristics of sub-study participants compared to non-participants.

| Characteristic                                  | Sub-Study Participants<br>( <i>n</i> = 105) | Non-Participants<br>( <i>n</i> = 34) |
|-------------------------------------------------|---------------------------------------------|--------------------------------------|
| Age, median (IQR), y                            | 54.6 (47.7–64.9)                            | 54.7 (48.5–61.4)                     |
| Sex, No. (%)                                    |                                             |                                      |
| Male                                            | 59 (56.2)                                   | 20 (58.8)                            |
| Female                                          | 46 (43.8)                                   | 14 (41.2)                            |
| Race, Ethnicity, No. (%)                        |                                             |                                      |
| White                                           | 81 (77.1)                                   | 26 (76.5)                            |
| Black                                           | 7 (6.7)                                     | 3 (8.8)                              |
| Asian                                           | 0 (0.0)                                     | 1 (2.9)                              |
| >1 Race                                         | 1 (0.95)                                    | 2 (5.9)                              |
| Other                                           | 16 (15.2)                                   | 2 (5.9)                              |
| ECOG Performance Status, No. (%)                |                                             |                                      |
| 0                                               | 53 (50.5)                                   | 16 (47.1)                            |
| 1                                               | 52 (49.5)                                   | 18 (52.9)                            |
| Primary Tumor Location, No. (%)                 |                                             |                                      |
| Right Colon                                     | 27 (25.7)                                   | 8 (23.5)                             |
| Transverse Colon                                | 10 (9.5)                                    | 2 (5.9)                              |
| Left Colon, Rectum                              | 68 (64.8)                                   | 24 (70.6)                            |
| Primary Tumor Resected, No. (%)                 | 37 (35.2)                                   | 10 (29.4)                            |
| No. of Metastatic Sites, mean (SD)              | 1.9 (0.92)                                  | 1.7 (0.84)                           |
| Carcinoembryonic Antigen *, median (IQR), ng/mL | 66.0 (5.3–406.9)                            | 38.7 (11.4–142.0)                    |
| Microsatellite Instability Status, No. (%)      |                                             |                                      |
| High                                            | 5 (4.8)                                     | 1 (2.9)                              |
| Stable                                          | 77 (73.3)                                   | 27 (79.4)                            |
| Unknown                                         | 23 (21.9)                                   | 6 (17.6)                             |
| KRAS Mutation Status, No. (%)                   |                                             |                                      |
| Wild Type                                       | 50 (47.6)                                   | 25 (73.5)                            |
| Mutated                                         | 46 (43.8)                                   | 8 (23.5)                             |
| Unknown                                         | 9 (8.6)                                     | 1 (2.9)                              |
| NRAS Mutation Status, No. (%)                   |                                             |                                      |
| Wild Type                                       | 59 (56.2)                                   | 20 (58.8)                            |
| Mutated                                         | 2 (1.9)                                     | 2 (5.9)                              |
| Unknown                                         | 44 (41.9)                                   | 12 (35.3)                            |
| BRAF V600E Mutation Status, No. (%)             |                                             |                                      |
| Wild Type                                       | 61 (58.1)                                   | 16 (47.1)                            |

|                                                  |                  |                  |
|--------------------------------------------------|------------------|------------------|
| Mutated                                          | 10 (9.5)         | 4 (11.8)         |
| Unknown                                          | 34 (32.4)        | 14 (41.2)        |
| Randomized Group, No. (%)                        |                  |                  |
| High-Dose Vitamin D <sub>3</sub>                 | 50 (47.6)        | 19 (55.9)        |
| Standard-Dose Vitamin D <sub>3</sub>             | 55 (52.4)        | 15 (44.1)        |
| Body Weight, median (IQR), kg                    | 77.6 (64.6–89.7) | 76.9 (63.1–96.6) |
| Body Mass Index, median (IQR), kg/m <sup>2</sup> | 26.3 (23.4–29.9) | 25.7 (20.9–32.5) |
| Plasma 25(OH)D †, median (IQR), ng/mL            | 16.7 (11.5–22.2) | 19.6 (13.4–25.5) |

\* Missing for 1 participant. † Missing for 15 participants.

**Table S2.** Comparison of baseline characteristics of sub-study participants with baseline and follow-up body composition measures compared to only baseline body composition measures.

| Characteristic                                | Baseline & Follow-Up (n = 75) | Baseline Only (n = 21) | Follow-Up Only (n = 9) |
|-----------------------------------------------|-------------------------------|------------------------|------------------------|
| Age, median (IQR), y                          | 53.5 (46.8–65.0)              | 60.3 (53.8–65.5)       | 52.3 (50.1–58.9)       |
| Sex, No. (%)                                  |                               |                        |                        |
| Male                                          | 39 (52.0)                     | 16 (76.2)              | 4 (44.4)               |
| Female                                        | 36 (48.0)                     | 5 (23.8)               | 5 (55.6)               |
| Race, Ethnicity, No. (%)                      |                               |                        |                        |
| White                                         | 61 (81.3)                     | 15 (71.4)              | 5 (55.6)               |
| Black                                         | 4 (5.3)                       | 1 (4.8)                | 2 (22.2)               |
| Asian                                         | 0 (0.0)                       | 0 (0.0)                | 0 (0.0)                |
| >1 Race                                       | 0 (0.0)                       | 1 (4.8)                | 0 (0.0)                |
| Other                                         | 10 (13.3)                     | 4 (19.0)               | 2 (22.2)               |
| ECOG Performance Status, No. (%)              |                               |                        |                        |
| 0                                             | 35 (46.7)                     | 11 (52.4)              | 7 (77.8)               |
| 1                                             | 40 (53.3)                     | 10 (47.6)              | 2 (22.2)               |
| Primary Tumor Location, No. (%)               |                               |                        |                        |
| Right Colon                                   | 21 (28.0)                     | 5 (23.8)               | 1 (11.1)               |
| Transverse Colon                              | 5 (6.7)                       | 4 (19.0)               | 1 (11.1)               |
| Left Colon, Rectum                            | 49 (65.3)                     | 12 (57.1)              | 7 (77.8)               |
| Primary Tumor Resected, No. (%)               | 30 (40.0)                     | 7 (33.3)               | 0 (0.0)                |
| No. of Metastatic Sites, mean (SD)            | 2.0 (0.93)                    | 1.6 (0.74)             | 2.0 (1.1)              |
| Carcinoembryonic Antigen, median (IQR), ng/mL | 133.0 (5.0–576.8)             | 30.6 (5.6–333.5)       | 57.9 (26.0–101.0)      |
| Microsatellite Instability Status, No. (%)    |                               |                        |                        |
| High                                          | 3 (4.0)                       | 2 (9.5)                | 0 (0.0)                |
| Stable                                        | 57 (76.0)                     | 12 (57.1)              | 8 (88.9)               |

|                                                            |                     |                     |                  |
|------------------------------------------------------------|---------------------|---------------------|------------------|
| Unknown                                                    | 15 (20.0)           | 7 (33.3)            | 1 (11.1)         |
| <i>KRAS</i> Mutation Status, No. (%)                       |                     |                     |                  |
| Wild Type                                                  | 36 (48.0)           | 8 (38.1)            | 6 (66.7)         |
| Mutated                                                    | 35 (46.7)           | 8 (38.1)            | 3 (33.3)         |
| Unknown                                                    | 4 (5.3)             | 5 (23.8)            | 0 (0.0)          |
| <i>NRAS</i> Mutation Status, No. (%)                       |                     |                     |                  |
| Wild Type                                                  | 45 (60.0)           | 8 (38.1)            | 6 (66.7)         |
| Mutated                                                    | 2 (2.7)             | 0 (0.0)             | 0 (0.0)          |
| Unknown                                                    | 28 (37.3)           | 13 (61.9)           | 3 (33.3)         |
| <i>BRAF V600E</i> Mutation Status, No. (%)                 |                     |                     |                  |
| Wild Type                                                  | 48 (64.0)           | 7 (33.3)            | 6 (66.7)         |
| Mutated                                                    | 6 (8.0)             | 3 (14.3)            | 1 (11.1)         |
| Unknown                                                    | 21 (28.0)           | 11 (52.4)           | 2 (22.2)         |
| Body Weight, median (IQR), kg                              | 77.6 (64.1–92.1)    | 80 (59.9–90.2)      | 76.2 (65.7–82.1) |
| Body Mass Index, median (IQR), kg/m <sup>2</sup>           | 26.3 (23.4–30.5)    | 26.4 (22.2–29.0)    | 26.3 (24.2–28.6) |
| Muscle Area, median (IQR), cm <sup>2</sup>                 | 141.5 (109.4–177.5) | 137.4 (113.0–169.6) | —                |
| Muscle Attenuation, median (IQR), HU                       | 37.1 (30.6–44.8)    | 37.7 (33.0–40.4)    | —                |
| Visceral Adipose Tissue, median (IQR), cm <sup>2</sup>     | 111.3 (47.8–199.6)  | 143.4 (64.8–230.9)  | —                |
| Subcutaneous Adipose Tissue, median (IQR), cm <sup>2</sup> | 199.2 (125.8–282.8) | 152.3 (113.6–235.4) | —                |
| Randomized Group, No. (%)                                  |                     |                     |                  |
| High-Dose Vitamin D <sub>3</sub>                           | 41 (54.7)           | 6 (28.6)            | 3 (33.3)         |
| Standard-Dose Vitamin D <sub>3</sub>                       | 34 (45.3)           | 15 (71.4)           | 6 (66.7)         |
| Plasma 25(OH)D, median (IQR), ng/mL                        | 17.2 (11.4–22.3)    | 19.5 (14.2–22.4)    | 16.5 (9.7–16.5)  |

**Table S3.** Change in of vitamin D<sub>3</sub> supplementation on plasma 25-hydroxyvitamin D concentrations among body composition sub-study participants.

| Plasma 25(OH)-D, ng/mL               | Baseline<br>[LS Mean (SE)] | Follow-Up<br>[LS Mean (SE)] | Δ Baseline to Follow-Up<br>(LS Mean, 95% CI) | Δ Between Group<br>(LS Mean, 95% CI) | <i>p</i> |
|--------------------------------------|----------------------------|-----------------------------|----------------------------------------------|--------------------------------------|----------|
| High-Dose Vitamin D <sub>3</sub>     | 15.1 (1.2)                 | 35.8 (1.6)                  | 20.7 (17.1, 24.4)                            | 20.0 (14.7, 25.2)                    | <0.001   |
| Standard-Dose Vitamin D <sub>3</sub> | 18.2 (1.2)                 | 18.9 (1.7)                  | 0.8 (−3.0, 4.6)                              | —                                    |          |

**Table S4.** Effects of vitamin D<sub>3</sub> supplementation on change in body composition outcomes using maximum likelihood regression without multiple imputation.

| Outcome & Group                                   | Baseline<br>[LS Mean (SE)] | Follow-Up<br>[LS Mean (SE)] | Δ Baseline to Follow-Up<br>(LS Mean, 95% CI) | Δ Between Group<br>(LS Mean, 95% CI) | <i>p</i> |
|---------------------------------------------------|----------------------------|-----------------------------|----------------------------------------------|--------------------------------------|----------|
| Body Weight, kg                                   |                            |                             |                                              |                                      |          |
| High-Dose Vitamin D <sub>3</sub>                  | 82.3 (3.19)                | 81.5 (3.23)                 | −0.8 (−2.6, 0.8)                             | −1.0 (−3.5, 1.6)                     | 0.45     |
| Standard-Dose Vitamin D <sub>3</sub>              | 76.9 (3.3)                 | 77.0 (3.36)                 | 0.1 (−1.7, 2.0)                              | —                                    |          |
| Body Mass Index, kg/m <sup>2</sup>                |                            |                             |                                              |                                      |          |
| High-Dose Vitamin D <sub>3</sub>                  | 28.8 (1.01)                | 28.5 (1.02)                 | −0.3 (−0.9, 0.3)                             | −0.3 (1.1, 0.6)                      | 0.51     |
| Standard-Dose Vitamin D <sub>3</sub>              | 27.2 (1.04)                | 27.2 (1.06)                 | −0.01 (−0.6, 0.6)                            | —                                    |          |
| Muscle Area, cm <sup>2</sup>                      |                            |                             |                                              |                                      |          |
| High-Dose Vitamin D <sub>3</sub>                  | 140.1 (4.6)                | 136.3 (4.7)                 | −3.8 (−7.9, 0.4)                             | −1.4 (−7.5, 4.8)                     | 0.66     |
| Standard-Dose Vitamin D <sub>3</sub>              | 134.1 (4.8)                | 131.8 (4.9)                 | −2.4 (−6.9, 2.1)                             | —                                    |          |
| Muscle Attenuation, HU                            |                            |                             |                                              |                                      |          |
| High-Dose Vitamin D <sub>3</sub>                  | 35.6 (1.39)                | 36.0 (1.49)                 | 0.4 (−1.7, 2.5)                              | 0.8 (−2.4, 3.9)                      | 0.63     |
| Standard-Dose Vitamin D <sub>3</sub>              | 38.6 (1.44)                | 38.2 (1.6)                  | −0.4 (−2.7, 1.9)                             | —                                    |          |
| Visceral Adipose Tissue Area, cm <sup>2</sup>     |                            |                             |                                              |                                      |          |
| High-Dose Vitamin D <sub>3</sub>                  | 127.3 (15.3)               | 126.7 (14.9)                | −0.6 (−10.5, 9.2)                            | −8.8 (−23.3, 5.7)                    | 0.23     |
| Standard-Dose Vitamin D <sub>3</sub>              | 109.9 (15.9)               | 118.1 (15.7)                | 8.2 (−2.5, 18.9)                             | —                                    |          |
| Subcutaneous Adipose Tissue Area, cm <sup>2</sup> |                            |                             |                                              |                                      |          |
| High-Dose Vitamin D <sub>3</sub>                  | 231.9 (20.1)               | 228.3 (21.4)                | −3.6 (−20.1, 12.9)                           | −8.8 (−33.2, 15.6)                   | 0.48     |
| Standard-Dose Vitamin D <sub>3</sub>              | 208.2 (20.8)               | 213.3 (22.3)                | 5.2 (−12.8, 23.1)                            | —                                    |          |

All results were from a linear mixed model for repeated measurements that was adjusted for age, number of metastatic sites, sex, race, and ECOG performance status.

**Publisher's Note:** MDPI stays neutral with regard to jurisdictional claims in published maps and institutional affiliations.

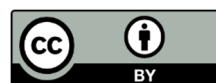

© 2020 by the authors. Licensee MDPI, Basel, Switzerland. This article is an open access article distributed under the terms and conditions of the Creative Commons Attribution (CC BY) license (<http://creativecommons.org/licenses/by/4.0/>).
